# Supplementary material
Source: ML conference proceedings conference paper supplement (https://proceedings.neurips.cc/paper_files/paper/2023/hash/8c2df4c35cdbee764ebb9e9d0acd5197-Abstract.html)
Supplement: Supplementary file 1 [file 8c2df4c35cdbee764ebb9e9d0acd5197-Supplemental-Conference.pdf]

---

# LLMs for Semi-Automated Data Science: Introducing CAAFE for Context-Aware Automated Feature Engineering

---

Anonymous Author(s)

Affiliation

Address

email

## Abstract

1 As the field of automated machine learning (AutoML) advances, it becomes in-  
2 creasingly important to incorporate domain knowledge into these systems. We  
3 present an approach for doing so by harnessing the power of large language models  
4 (LLMs). Specifically, we introduce Context-Aware Automated Feature Engineering  
5 (CAAFE), a feature engineering method for tabular datasets that utilizes an LLM to  
6 iteratively generate additional semantically meaningful features for tabular datasets  
7 based on the description of the dataset. The method produces both Python code for  
8 creating new features and explanations for the utility of the generated features.

9 Despite being methodologically simple, CAAFE improves performance on 11 out  
10 of 14 datasets - boosting mean ROC AUC performance from 0.798 to 0.822 across  
11 all dataset - similar to the improvement achieved by using a random forest instead  
12 of logistic regression on our datasets.

13 Furthermore, CAAFE is interpretable by providing a textual explanation for each  
14 generated feature. CAAFE paves the way for more extensive (semi-)automation in  
15 data science tasks and emphasizes the significance of context-aware solutions that  
16 can extend the scope of AutoML systems. For reproducibility, we release our [code](#)  
17 and [a simple demo](#).

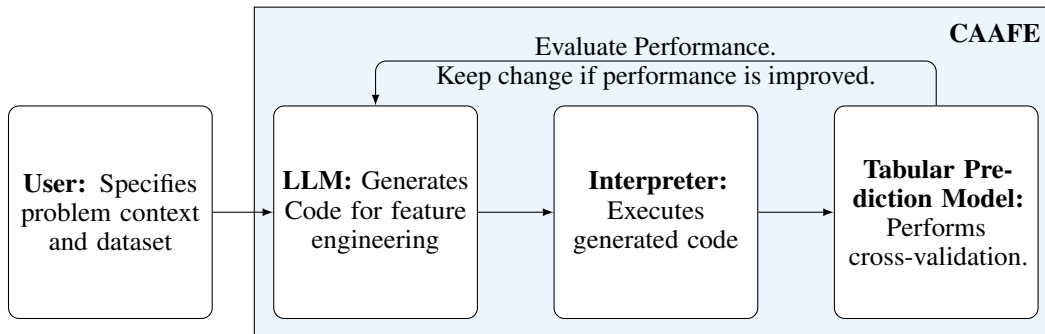

Figure 1: CAAFE accepts a dataset as well as user-specified context information and operates by iteratively proposing and evaluating feature engineering operations.

# 1 Introduction

Automated machine learning (AutoML; e.g., Hutter et al. (2019)) is very effective at optimizing the machine learning (ML) part of the data science workflow, but existing systems leave tasks such as data engineering and integration of domain knowledge largely to human practitioners. However, model selection, training, and scoring only account for a small percentage of the time spent by data scientists (roughly 23% according to the “State of Data Science”(Anaconda, 2020)). Thus, the most time-consuming tasks, namely data engineering and data cleaning, are only supported to a very limited degree by AutoML tools, if at all.

While the traditional AutoML approach has been fruitful and appropriate given the technical capabilities of ML tools at the time, large language models (LLMs) may extend the reach of AutoML to cover more of data science and allow it to evolve towards *automated data science* (De Bie et al., 2022). LLMs encapsulate extensive domain knowledge that can be used to automate various data science tasks, including those that require contextual information. They are, however, not interpretable, or verifiable, and behave less consistently than classical ML algorithms. E.g., even the best LLMs still fail to count or perform simple calculations that are easily solved by classical methods (Hendrycks et al., 2021; OpenAI Community, 2021).

In this work, we propose an approach that combines the scalability and robustness of classical ML classifiers (e.g. random forests (Breiman, 2001)) with the vast domain knowledge embedded in LLMs, as visualized in Figure 2. We bridge the gap between LLMs and classical algorithms by using code as an interface that allows LLMs to interact with classical algorithms and provides an interpretable interface to users. Our proposed method, CAAFE, generates Python code that creates semantically meaningful features that improve the performance of downstream prediction tasks in an iterative fashion and with algorithmic feedback as shown in Figure 1. Furthermore, it provides explanations for the utility of generated features. This allows for human-in-the-loop, interpretable AutoML (Lee & Macke, 2020), making it easier for the user to understand a solution, but also to modify and improve on it. Our approach combines the advantages of classical ML (robustness, predictability and a level of interpretability) and LLMs (domain-knowledge and creativity).

Automating the integration of domain-knowledge into the AutoML process has clear advantages that extend the scope of existing AutoML methods. These benefits include: i) Reducing the latency from data to trained models; ii) Reducing the cost of creating ML models; iii) Evaluating a more informed space of solutions than previously possible with AutoML, but a larger space than previously possible with manual approaches for integrating domain knowledge; and iv) Enhancing the robustness and reproducibility of solutions, as computer-generated solutions are more easily reproduced. CAAFE demonstrates the potential of LLMs for automating a broader range of data science tasks and highlights the emerging potential for creating more robust and context-aware AutoML tools.

## 2 Background

### 2.1 Large Language Models (LLMs)

LLMs are neural networks that are pre-trained on large quantities of raw text data to predict the next word in text documents. Recently, GPT-4 has been released as a powerful and publicly available LLM (OpenAI, 2023a). GPT-4 is a deep neural network that uses a transformer architecture (Vaswani et al., 2017), large-scale pre-training on a diverse corpus of text and fine-tuning using reinforcement learning from human feedback (RLHF) (Ziegler et al., 2019). It achieves state-of-the-art performance on various tasks, such as text generation, summarization, question answering and coding. One can adapt LLMs to a specific task without retraining by writing a prompt (Brown et al., 2020; Wei et al., 2021); the model parameters are frozen and the model performs in-context inference tasks based on a textual input that formulates the task and potentially contains examples.

**LLMs as Tabular Prediction Models** Hegselmann et al. (2023) recently showed how to use LLMs for tabular data prediction by applying them to a textual representation of these datasets. A prediction on an unseen sample then involves continuing the textual description of that sample on the target column. However, this method requires encoding the entire training dataset as a string and processing it using a transformer-based architecture, where the computational cost increases quadratically with respect to  $N \cdot M$ , where  $N$  denotes the number of samples and  $M$  the number of

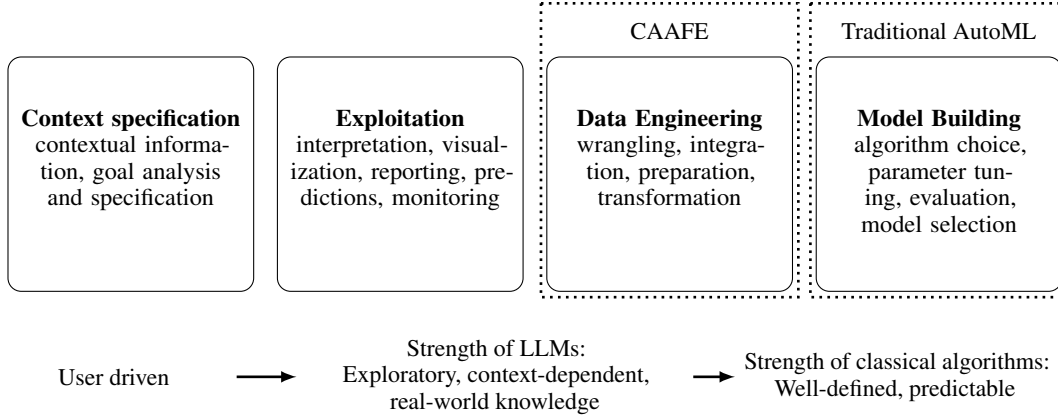

Figure 2: Data Science pipeline, inspired by De Bie et al. (2022). We introduce LLMs for data Science as an intermediate between the user and classical algorithms.

70 features. Furthermore, the predictions generated by LLMs are not easily interpretable, and there is no  
 71 assurance that the LLMs will produce consistent predictions, as these predictions depend directly  
 72 on the complex and heterogeneous data used to train the models. So far, Hegselmann et al. (2023)  
 73 found that their method yielded the best performance on tiny datasets with up to 8 data points, but  
 74 was outperformed for larger data sets.

75 **LLMs for Data Wrangling** Narayan et al. (2022) demonstrated state-of-the-art results using LLMs  
 76 for entity matching, error detection, and data imputation using prompting and manually tuning the  
 77 LLMs. Vos et al. (2022) extended this technique by employing an improved prefix tuning technique.  
 78 Both approaches generate and utilize the LLMs output for each individual data sample, executing  
 79 a prompt for each row. This is in contrast to CAAFE, which uses code as an interface, making our  
 80 work much more scalable and faster to execute, since one LLM query can be applied to all samples.

## 81 2.2 Feature Engineering

82 Feature engineering refers to the process of constructing suitable features from raw input data, which  
 83 can lead to improved predictive performance. Given a dataset  $D = (x_i, y_i)_{i=1}^n$ , the goal is to find a  
 84 function  $\phi : \mathcal{X} \rightarrow \mathcal{X}'$  which maximizes the performance of  $A(\phi(x_i), y_i)$  for some learning algorithm  
 85  $A$ . Common methods include numerical transformations, categorical encoding, clustering, group  
 86 aggregation, and dimensionality reduction techniques, such as principal component analysis (Wold  
 87 et al., 1987).

88 Deep learning methods are capable of learning suitable transformations from the raw input data  
 89 making them more data-driven and making explicit feature engineering less critical, but only given  
 90 a lot of data. Thus, appropriate feature engineering still improves the performance of classical and  
 91 deep learning models, particularly for limited data, complex patterns, or model interpretability.

92 Various strategies for automated feature engineering have been explored in prior studies. Deep  
 93 Feature Synthesis (DFS; Kanter & Veeramachaneni (2015)) integrates multiple tables for feature  
 94 engineering by enumerating potential transformations on features and performing feature selection  
 95 based on model performance. Cognito (Khurana et al., 2016) proposes a tree-like exploration of the  
 96 feature space using handcrafted heuristic traversal strategies. AutoFeat (Horn et al., 2019) employs  
 97 an iterative subsampling of features using beam search. Learning-based methods, such as LFE  
 98 (Nargesian et al., 2017), utilize machine learning models to recommend beneficial transformations  
 99 while other methods use reinforcement learning-based strategies (Khurana et al., 2018; Zhang et al.,  
 100 2019). Despite these advancements, none of the existing methods can harness semantic information  
 101 in an automated manner.

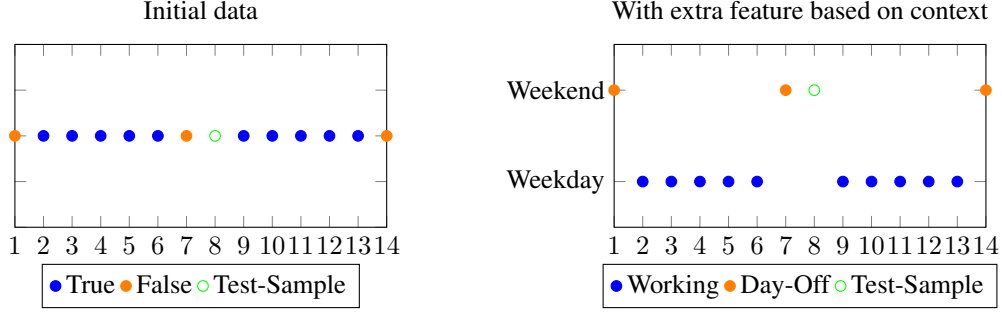

Figure 3: Contextual information can simplify a task immensely. On the left-hand side no contextual information is added to the plot, and it is hard to predict the label for the green query point. On the right-hand side contextual information is added and a useful additional feature (weekend or weekday) is derived from which a mapping from features to targets can be found.

### 2.2.1 Incorporating Semantic Information

The potential feature space, when considering the combinatorial number of transformations and combinations, is vast. Therefore, semantic information is useful, to serve as a prior for identifying useful features. By incorporating semantic and contextual information, feature engineering techniques can be limited to semantically meaningful features enhancing the performance by mitigating issues with multiple testing and computational complexity and boosting the interpretability of machine learning models. This strategy is naturally applied by human experts who leverage their domain-specific knowledge and insights. Figure 3 exemplifies the usefulness of contextual information.

## 3 Method

We present CAAFE, an approach that leverages large language models to incorporate domain knowledge into the feature engineering process, offering a promising direction for automating data science tasks while maintaining interpretability and performance.

Our method takes the training and validation datasets,  $D_{train}$  and  $D_{valid}$ , as well as a description of the context of the training dataset and features as input. From this information CAAFE constructs a prompt, i.e. instructions to the LLM containing specifics of the dataset and the feature engineering task. Our method performs multiple iterations of feature alterations and evaluations on the validation dataset, as outlined in Figure 1. In each iteration, the LLM generates code, which is then executed on the current  $D_{train}$  and  $D_{valid}$  resulting in the transformed datasets  $D'_{train}$  and  $D'_{valid}$ . We then use  $D'_{train}$  to fit an ML-classifier and evaluate its performance  $P'$  on  $D'_{valid}$ . If  $P'$  exceeds the performance  $P$  achieved by training on  $D_{train}$  and evaluating on  $D_{valid}$ , the feature is kept and we set  $D_{train} := D'_{train}$  and  $D_{valid} := D'_{valid}$ . Otherwise, the feature is rejected and  $D_{train}$  and  $D_{valid}$  remain unchanged. Figure 4 shows a shortened version of one such run on the Tic-Tac-Toe Endgame dataset.

**Prompting LLMs for Feature Engineering Code** Here, we describe how CAAFE builds the prompt that is used to perform feature engineering. In this prompt, the LLM is instructed to create valuable features for a subsequent prediction task and to provide justifications for the added feature’s utility. It is also instructed to drop unnecessary features, e.g. when their information is captured by other created features.

The prompt contains semantic and descriptive information about the dataset. Descriptive information, i.e. summary statistics, such as the percentage of missing values is based solely on the train split of the dataset. The prompt consists of the following data points:

- A** A user-generated dataset description, that contains contextual information about the dataset (see Section 4 for details on dataset descriptions for our experiments)
- B** Feature names adding contextual information and allowing the LLM to generate code to index features by their names

Dataset description: Tic-Tac-Toe Endgame database  
 This database encodes the complete set of possible board configurations at the end of tic-tac-toe games, where "x" is assumed to have played first. The target concept is "win for x" (i.e., true when "x" has one of 8 possible ways to create a "three-in-a-row").

```
# ('number-of-x-wins', 'Number of ways x can win on the board')
# Usefulness: Knowing the number of ways x can win on the board can be useful in
# predicting whether x has won the game or not.
# Input samples: 'top-left-square': [2, 2, 1], 'top-middle-square': [1, 2, 0], ...
df['number-of-x-wins'] = ((df['top-left-square']==1) & (df['top-middle-square']==1) & (df
['top-right-square']==1)).astype(int) + ((df['middle-left-square']==1) & (df['middle
-middle-square']==1) & (df['middle-right-square']==1)).astype(int) [...]
```

Iteration 1  
 Performance before adding features ROC 0.888, ACC 0.700.  
 Performance after adding features ROC 0.987, ACC 0.980.  
 Improvement ROC 0.099, ACC 0.280. Code was executed and changes to df retained.

```
# ('number-of-o-wins', 'Number of ways o can win on the board')
# Usefulness: Knowing the number of ways o can win on the board can be useful in
# predicting whether o has won the game or not.
# Input samples: 'top-left-square': [2, 2, 1], 'top-middle-square': [1, 2, 0], ...
df['number-of-o-wins'] = ((df['top-left-square']==2) & (df['top-middle-square']==2) & (df
['top-right-square']==2)).astype(int) + ((df['middle-left-square']==2) & (df['middle
-middle-square']==2) & (df['middle-right-square']==2)).astype(int) [...]
```

Iteration 2  
 Performance before adding features ROC 0.987, ACC 0.980.  
 Performance after adding features ROC 1.000, ACC 1.000.  
 Improvement ROC 0.013, ACC 0.020. Code was executed and changes to df retained.

Figure 4: Exemplary run of CAAFE on the Tic-Tac-Toe Endgame dataset. User generated input is shown in blue, ML-classifier generated data shown in red and LLM generated code is shown with syntax highlighting. The generated code contains a comment per generated feature that follows a template provided in our prompt (Feature name, description of usefulness, features used in the generated code and sample values of these features). In this run, CAAFE improves the ROC AUC on the validation dataset from 0.888 to 1.0 in two feature engineering iterations.

137 **C** Data types (e.g. float, int, category, string) - this adds information on how to handle a feature  
 138 in the generated code

139 **D** Percentage of missing values - missing values are an additional challenge for code generation

140 **E** 10 rows of sample data from the dataset - this provides information on the feature scale,  
 141 encoding, etc.

142 Additionally, the prompt provides a template for the expected form of the generated code and  
 143 explanations. Adding a template when prompting is a common technique to improve the quality  
 144 of responses (OpenAI, 2023b). We use Chain-of-thought instructions – instructing a series of  
 145 intermediate reasoning steps –, another effective technique for prompting (Wei et al., 2023). The  
 146 prompt includes an example of one such Chain-of-thought for the code generation of one feature:  
 147 first providing the high-level meaning and usefulness of the generated feature, providing the names  
 148 of features used to generate it, retrieving sample values it would need to accept and finally writing a  
 149 line of code. We provide the complete prompt in Figure 5 in the appendix.

150 If the execution of a code block raises an error, this error is passed to the LLM for the next code  
151 generation iteration. We observe that using this technique CAAFE recovered from all errors in our  
152 experiments. One such example can be found in Table 3.

153 **Technical Setup** The data is stored in a Pandas dataframe (Wes McKinney, 2010), which is  
154 preloaded into memory for code execution. The generated Python code is executed in an environment  
155 where the training and validation data frame is preloaded. The performance is measured on the  
156 current dataset with ten random validation splits  $D_{valid}$  and the respective transformed datasets  
157  $D'_{valid}$  with the mean change of accuracy and ROC AUC used to determine if the changes of a code  
158 block are kept, i.e. when the average of both is greater than 0. We use OpenAI’s GPT-4 and GPT-3.5  
159 as LLMs (OpenAI, 2023a) in CAAFE. We perform ten feature engineering iterations and TabPFN in  
160 the iterative evaluation of code blocks.

161 The automatic execution of AI-generated code carries inherent risks, such as misuse by malicious  
162 actors or unintended consequences from AI systems operating outside of controlled environments.  
163 Our approach is informed by previous studies on AI code generation and cybersecurity (Rohlf, 2023;  
164 Crockett, 2023). We parse the syntax of the generated python code and use a whitelist of operations  
165 that are allowed for execution. Thus operations such as imports, arbitrary function calls and others  
166 are excluded. This does not provide full security, however, e.g. does not exclude operations that can  
167 lead to infinite loops and excessive resource usage such as loops and list comprehensions.

## 168 4 Experimental Setup

169 **Setup of Downstream-Classifiers** We evaluate our method with Logistic Regression, Random  
170 Forests (Breiman, 2001) and TabPFN (Hollmann et al., 2022) for the final evaluation while using  
171 TabPFN to evaluate the performance of added features. We impute missing values with the mean,  
172 one-hot or ordinal encoded categorical inputs, normalized features and passed categorical feature  
173 indicators, where necessary, using the setup of Hollmann et al. (2022) <sup>1</sup>.

174 **Setup of Automated Feature Engineering Methods** We also evaluate popular context-agnostic  
175 feature engineering libraries Deep Feature Synthesis (DFS; Kanter & Veeramachaneni, 2015) and  
176 AutoFeat (Horn et al., 2019) <sup>2</sup>. We evaluate DFS and AutoFeat alone and in combination with CAAFE.  
177 When combined, CAAFE is applied first and the context-agnostic AutoFE method subsequently. For  
178 DFS we use the primitives "add\_numeric" and "multiply\_numeric", and default settings otherwise.  
179 For TabPFN, DFS generates more features than TabPFN accepts (the maximum number of features  
180 is 100) in some cases. In these cases, we set the performance to the performance without feature  
181 engineering. For AutoFeat, we use one feature engineering step and default settings otherwise.

182 **Evaluating LLMs on Tabular Data** The LLM’s training data originates from the web, potentially  
183 including datasets and related notebooks. GPT-4 and GPT-3.5 have a knowledge cutoff in September  
184 2021, i.e., almost all of its training data originated from before this date. Thus, an evaluation on  
185 established benchmarks can be biased since a textual description of these benchmarks might have  
186 been used in the training of the LLM.

187 We use two categories of datasets for our evaluation: (1) widely recognized datasets from OpenML  
188 released before September 2021, that could potentially be part of the LLMs training corpus and (2)  
189 lesser known datasets from Kaggle released after September 2021 and only accessible after accepting  
190 an agreement and thus harder to access by web crawlers.

191 From OpenML (Vanschoren et al., 2013; Feurer et al.), we use small datasets that have descriptive  
192 feature names (i.e. we do not include any datasets with numbered feature names). Datasets on  
193 OpenML contain a task description that we provide as user context to our method. When datasets are  
194 perfectly solvable with TabPFN alone (i.e. reaches ROC AUC of 1.0) we reduce the training set size  
195 for that dataset, marked in Table ???. We focus on small datasets with up to 2 000 samples in total,  
196 because feature engineering is most important and significant for smaller datasets.

197 We describe the collection and preprocessing of datasets in detail in Appendix G.1.

<sup>1</sup>[https://github.com/automl/TabPFN/blob/main/tabpfn/scripts/tabular\\_baselines.py](https://github.com/automl/TabPFN/blob/main/tabpfn/scripts/tabular_baselines.py)

<sup>2</sup><https://github.com/alteryx/featuretools>, <https://github.com/cod3licious/autofeat>

Table 1: ROC AUC OVO results using TabPFN.  $\pm$  indicates the standard deviation across 5 splits. [R] indicates datasets where reduced data was used because TabPFN had 100% accuracy by default, see Appendix G.1.

|                                              | TabPFN                  |                         |                         |
|----------------------------------------------|-------------------------|-------------------------|-------------------------|
|                                              | No Feat. Eng.           | CAAFE (GPT-3.5)         | CAAFE (GPT-4)           |
| airlines                                     | <b>0.6211</b> $\pm$ .04 | 0.619 $\pm$ .04         | 0.6203 $\pm$ .04        |
| balance-scale [R]                            | 0.8444 $\pm$ .29        | 0.844 $\pm$ .31         | <b>0.882</b> $\pm$ .26  |
| breast-w [R]                                 | 0.9783 $\pm$ .02        | <b>0.9809</b> $\pm$ .02 | <b>0.9809</b> $\pm$ .02 |
| cmc                                          | 0.7375 $\pm$ .02        | 0.7383 $\pm$ .02        | <b>0.7393</b> $\pm$ .02 |
| credit-g                                     | 0.7824 $\pm$ .03        | 0.7824 $\pm$ .03        | <b>0.7832</b> $\pm$ .03 |
| diabetes                                     | 0.8427 $\pm$ .03        | <b>0.8434</b> $\pm$ .03 | 0.8425 $\pm$ .03        |
| eucalyptus                                   | <b>0.9319</b> $\pm$ .01 | 0.9317 $\pm$ .01        | <b>0.9319</b> $\pm$ .00 |
| jungle_chess..                               | 0.9334 $\pm$ .01        | 0.9361 $\pm$ .01        | <b>0.9453</b> $\pm$ .01 |
| pc1                                          | 0.9035 $\pm$ .01        | 0.9087 $\pm$ .02        | <b>0.9093</b> $\pm$ .01 |
| tic-tac-toe [R]                              | 0.6989 $\pm$ .08        | 0.6989 $\pm$ .08        | <b>0.9536</b> $\pm$ .06 |
| $\langle$ Kaggle $\rangle$ health-insurance  | 0.5745 $\pm$ .02        | 0.5745 $\pm$ .02        | <b>0.5748</b> $\pm$ .02 |
| $\langle$ Kaggle $\rangle$ pharyngitis       | 0.6976 $\pm$ .03        | 0.6976 $\pm$ .03        | <b>0.7078</b> $\pm$ .04 |
| $\langle$ Kaggle $\rangle$ kidney-stone      | 0.7883 $\pm$ .04        | 0.7873 $\pm$ .04        | <b>0.7903</b> $\pm$ .04 |
| $\langle$ Kaggle $\rangle$ spaceship-titanic | 0.838 $\pm$ .02         | 0.8383 $\pm$ .02        | <b>0.8405</b> $\pm$ .02 |
| Mean ROC AUC                                 | 0.798 $\pm$ .05         | 0.7987 $\pm$ .05        | <b>0.8215</b> $\pm$ .04 |
| Mean ROC AUC Rank                            | 2.43                    | 2.32                    | <b>1.25</b>             |

**Evaluation Protocol** For each dataset, we evaluate 5 repetitions, each with a different random seed and train- and test split to reduce the variance stemming from these splits (Bouthillier et al., 2021). We split into 50% train and 50% test samples and all methods used the same splits.

## 5 Results

In this section we showcase the results of our method in three different ways. First, we show that CAAFE can improve the performance of a state-of-the-art classifier. Next, we show how CAAFE interacts with traditional automatic feature engineering methods and conclude with examples of the features that CAAFE creates.

**Performance of CAAFE** CAAFE can improve our strongest classifier, TabPFN, substantially. If it is used with GPT-4, we improve average ROC AUC performance from 0.798 to 0.822, as shown in Table 5, and enhance the performance for 11/14 datasets. On the evaluated datasets, this improvement is similar (71%) to the average improvement achieved by using a random forest (AUC 0.783) instead of logistic regression (AUC 0.749). We can see that CAAFE even improves performance for all of the new datasets from Kaggle. If we use CAAFE with GPT-3.5 only, we can see that it performs clearly worse than with GPT-4, and only improves performance on 6/14.

Table 2: Mean ROC AUC and average rank (ROC AUC) per downstream classification method and feature extension method. The features generated by CAAFE are chosen with TabPFN as classifier.  $\pm$  indicates the standard deviation across 5 splits. AutoFeat and DFS improve simpler classifiers but not TabPFN, while CAAFE improves all setups.

|              |           |                 | AutoFE-Base     |                 | CAAFE           |                        | AutoFE-Base + CAAFE    |                        |
|--------------|-----------|-----------------|-----------------|-----------------|-----------------|------------------------|------------------------|------------------------|
|              |           |                 | AutoFeat        | DFS             | GPT-3.5         | GPT-4                  | GPT-4 + AF             | GPT-4 + DFS            |
| Log. Reg.    | Mean      | 0.749 $\pm$ .14 | 0.754 $\pm$ .14 | 0.764 $\pm$ .14 | 0.75 $\pm$ .14  | 0.769 $\pm$ .13        | 0.781 $\pm$ .14        | <b>0.784</b> $\pm$ .14 |
|              | Mean Rank | 5.11            | 4.21            | 3.36            | 4.79            | 4.31                   | 3.52                   | <b>2.69</b>            |
| Rand. Forest | Mean      | 0.783 $\pm$ .13 | 0.782 $\pm$ .12 | 0.781 $\pm$ .14 | 0.783 $\pm$ .13 | 0.801 $\pm$ .14        | <b>0.808</b> $\pm$ .14 | 0.808 $\pm$ .14        |
|              | Mean Rank | 4.44            | 4.41            | 4.14            | 4.38            | 4.28                   | <b>3.15</b>            | 3.21                   |
| TabPFN       | Mean      | 0.798 $\pm$ .14 | 0.797 $\pm$ .14 | 0.791 $\pm$ .15 | 0.799 $\pm$ .14 | <b>0.822</b> $\pm$ .14 | 0.821 $\pm$ .14        | 0.818 $\pm$ .14        |
|              | Mean Rank | 4.39            | 4.4             | 4.76            | 4.26            | <b>3.06</b>            | 3.27                   | 3.86                   |

Table 3: Examples of common strategies employed by CAAFE for feature extension. The full code and comments are automatically generated based on the user-provided dataset descriptions.

| Description                                                                                                                                                                                                                               | Generated code                                                                                                                                                                                                                                                                                                                                                                                                                                                                                                                                                                                                                                                                                                                                                                                                                                                                                              |
|-------------------------------------------------------------------------------------------------------------------------------------------------------------------------------------------------------------------------------------------|-------------------------------------------------------------------------------------------------------------------------------------------------------------------------------------------------------------------------------------------------------------------------------------------------------------------------------------------------------------------------------------------------------------------------------------------------------------------------------------------------------------------------------------------------------------------------------------------------------------------------------------------------------------------------------------------------------------------------------------------------------------------------------------------------------------------------------------------------------------------------------------------------------------|
| <b>Combination</b><br>Example from the Kaggle Kidney Stone dataset.                                                                                                                                                                       | <pre> # Usefulness: Fever and rhinorrhea are two of the most common # symptoms of respiratory infections, including GAS pharyngitis. # This feature captures their co-occurrence. # Input samples: 'temperature': [38.0, 39.0, 39.5], 'rhinorrhea': # [0.0, 0.0, 0.0] df['fever_and_rhinorrhea'] = ((df['temperature'] &gt;= 38.0) &amp; (df['rhinorrhea'] &gt; 0)).astype(int) </pre>                                                                                                                                                                                                                                                                                                                                                                                                                                                                                                                      |
| <b>Binning</b><br>Example from the Kaggle Spaceship Titanic dataset.                                                                                                                                                                      | <pre> # Feature: AgeGroup (categorizes passengers into age groups) # Usefulness: Different age groups might have different likelihoods # of being transported. # Input samples: 'Age': [30.0, 0.0, 37.0] bins = [0, 12, 18, 35, 60, 100] labels = ['Child', 'Teen', 'YoungAdult', 'Adult', 'Senior'] df['AgeGroup'] = pd.cut(df['Age'], bins=bins, labels=labels) df['AgeGroup'] = df['AgeGroup'].astype('category') </pre>                                                                                                                                                                                                                                                                                                                                                                                                                                                                                 |
| <b>String transformation</b><br>Example from the Kaggle Spaceship Titanic dataset.                                                                                                                                                        | <pre> # Feature: Deck # Usefulness: The deck information can help identify patterns in the # location of cabins associated with transported passengers. # Input samples: 'Cabin': ['F/356/S', 'G/86/P', 'C/37/P'] df['Deck'] = df['Cabin'].apply(lambda x: x[0] if isinstance(x, str) else 'Unknown')  # Feature: CabinSide # Usefulness: The side of the cabin can help identify patterns in # the location of cabins associated with transported passengers. # Input samples: 'Cabin': ['F/356/S', 'G/86/P', 'C/37/P'] df['CabinSide'] = df['Cabin'].apply(lambda x: x.split('/')[1] if isinstance(x, str) else 'Unknown') </pre>                                                                                                                                                                                                                                                                         |
| <b>Removing features</b><br>Example from the Balance Scale dataset.                                                                                                                                                                       | <pre> # Drop original columns # Explanation: The original columns 'left-weight', 'left-distance', # 'right-weight', and 'right-distance' can be dropped as the # newly created columns 'left_moment', 'right_moment', and ' # moment_difference' capture the relevant information for # predicting the 'class'. df.drop(columns=['left-weight', 'left-distance', 'right-weight', ' right-distance'], inplace=True) # No more additional columns needed </pre>                                                                                                                                                                                                                                                                                                                                                                                                                                               |
| <b>Error Recovery</b><br>Example from the Kaggle Health Insurance dataset. The code execution failed because missing values were not considered in the dataframe. In the next iteration code is suggested that can handle missing values. | <pre> # Feature: Age_difference # Usefulness: Age difference between upper and lower age can be # useful in determining the likelihood of a person applying for a # policy. # Input samples: 'Upper_Age': ['C33', 'C2', 'C3'], 'Lower_Age': [' Owned', 'Rented', 'Rented'] df['Age_difference'] = df['Upper_Age'].str.extract('(\d+)').astype( int) - df['Lower_Age'].str.extract('(\d+)').astype(int)  Feedback: failed with error: cannot convert float NaN to integer.  # Feature: Age_difference # Usefulness: Age difference between upper and lower age can be # useful in determining the likelihood of a person applying for a # policy. # Input samples: 'Upper_Age': ['C33', 'C2', 'C3'], 'Lower_Age': [' Owned', 'Rented', 'Rented'] df['Age_difference'] = df['Upper_Age'].str.extract('(\d+)').astype( float).fillna(0) - df['Lower_Age'].str.extract('(\d+)').astype( float).fillna(0) </pre> |

There is great variability in the improvement size depending on whether (1) a problem is amenable to feature engineering, i.e. is there a mapping of features that explains the data better and that can be expressed through simple code; and (2) the quality of the dataset description (e.g., the balance-scale dataset contains an accurate description of how the dataset was constructed) Per dataset performance can be found in Table 4. CAAFE takes 4:43 minutes to run on each dataset, 90% of the time is spent on the LLM’s code generation and 10% on the evaluation of the generated features. Running CAAFE with 10 iterations costs 0.71\$ per dataset on average. In Appendix F we plot the performance, time and cost of CAAFE across feature engineering iterations, showing the tradeoff between these parameters. For the 14 datasets, 5 splits and 10 CAAFE iterations, CAAFE generates 52 faulty features (7.4%) in the generation stage, from which it recovers (see Figure 3).

**Incorporating Classical AutoFE Methods** Classical AutoFE methods can readily be combined with our method, one simply runs CAAFE first and then lets a classical AutoFE method find further feature extensions, as we did in Table 5. For less powerful downstream classifiers, namely Logistic Regression and Random Forests, we observe that applying AutoFE additionally to CAAFE improves performance further. The AutoML method TabPFN on the other hand cannot be improved by applying classical AutoFE. This discrepancy might stem from the larger hypothesis space (complexity) of TabPFN, it can get all necessary information from the data directly. For all combinations of classifiers and additional AutoFE methods, we can see that CAAFE improves performance on average.

**Feature Engineering Strategies** Table 3 shows a diverse set of examples of feature engineering strategies applied by our method. We show examples where CAAFE combines features, creates ordinal versions of numerical features through binning, performs string transformations, removes superfluous features, and even recover from errors when generating code that errors.

## 6 Conclusion

Our study presents a novel approach to integrating domain knowledge into the AutoML process through Context-Aware Automated Feature Engineering (CAAFE). By leveraging the power of large language models, CAAFE automates feature engineering for tabular datasets, generating semantically meaningful features and explanations of their utility. Our evaluation demonstrates the effectiveness of this approach, which complements existing automated feature engineering and AutoML methods.

This work emphasizes the importance of context-aware solutions in achieving robust outcomes. We expect that LLMs will also be useful for automating other aspects of the data science pipeline, such as data collection, processing, model building, and deployment. As large language models continue to improve, it is expected that the effectiveness of CAAFE will also increase.

Dataset descriptions play a critical role in our method; however, in our study, they were derived solely from web-crawled text associated with public datasets. If users were to provide more accurate and detailed descriptions, the effectiveness of our approach could be significantly improved.

However, our current approach has some limitations. Handling datasets with a large number of features can lead to very large prompts, which can be challenging for LLMs to process effectively. The testing procedure for adding features is not based on statistical tests, and could be improved using techniques of previous feature engineering works. Finally, the usage of LLMs in automated data analysis comes with a set of societal and ethical challenges. Please see Section B for a discussion on safeguarding code execution, biases in LLMs and societal implications of automation.

Future research may explore prompt tuning, fine-tuning language models, and automatically incorporating domain-knowledge into models in other ways. Also, there may lie greater value in the interaction of human users with such automated methods, also termed human-in-the-loop AutoML (Lee & Macke, 2020), where human and algorithm interact continuously. This would be particularly easy with a setup similar to CAAFE, as the input and output of the LLM are interpretable and easily modified by experts.

## References

- Anaconda. The state of data science 2020. Website, 2020. URL <https://www.anaconda.com/state-of-data-science-2020>.
- Xavier Bouthillier, Pierre Delaunay, Mirko Bronzi, Assya Trofimov, Brennan Nichyporuk, Justin Szeto, Nazanin Mohammadi Sepahvand, Edward Raff, Kanika Madan, Vikram Voleti, Samira Ebrahimi Kahou, Vincent Michalski, Tal Arbel, Chris Pal, Gael Varoquaux, and Pascal Vincent. Accounting for variance in machine learning benchmarks. In A. Smola, A. Dimakis, and I. Stoica (eds.), *Proceedings of Machine Learning and Systems*, volume 3, pp. 747–769, 2021. URL [https://proceedings.mlsys.org/paper\\_files/paper/2021/file/cfecdb276f634854f3ef915e2e980c31-Paper.pdf](https://proceedings.mlsys.org/paper_files/paper/2021/file/cfecdb276f634854f3ef915e2e980c31-Paper.pdf).
- Leo Breiman. Random forests. *Machine learning*, 45:5–32, 2001.
- Tom Brown, Benjamin Mann, Nick Ryder, Melanie Subbiah, Jared D Kaplan, Prafulla Dhariwal, Arvind Neelakantan, Pranav Shyam, Girish Sastry, Amanda Askell, et al. Language models are few-shot learners. *Advances in neural information processing systems*, 33:1877–1901, 2020.
- Adam Crockett. Ai generated code creates a new security attack vector, April 2023. URL [https://dev.to/adam\\_cyclones/ai-generated-code-creates-a-new-security-attack-vector-39if](https://dev.to/adam_cyclones/ai-generated-code-creates-a-new-security-attack-vector-39if).
- Tijl De Bie, Luc De Raedt, José Hernández-Orallo, Holger H Hoos, Padhraic Smyth, and Christopher KI Williams. Automating data science. *Communications of the ACM*, 65(3):76–87, 2022.
- Matthias Feurer, Jan N. van Rijn, Arlind Kadra, Pieter Gijsbers, Neeratyoy Mallik, Sahithya Ravi, Andreas Mueller, Joaquin Vanschoren, and Frank Hutter. Openml-python: an extensible python api for openml. *arXiv*, 1911.02490. URL <https://arxiv.org/pdf/1911.02490.pdf>.
- Stefan Hegselmann, Alejandro Buendia, Hunter Lang, Monica Agrawal, Xiaoyi Jiang, and David Sontag. Tabllm: Few-shot classification of tabular data with large language models, 2023.
- Dan Hendrycks, Collin Burns, Saurav Kadavath, Akul Arora, Steven Basart, Eric Tang, Dawn Song, and Jacob Steinhardt. Measuring mathematical problem solving with the MATH dataset. *CoRR*, abs/2103.03874, 2021. URL <https://arxiv.org/abs/2103.03874>.
- Noah Hollmann, Samuel Müller, Katharina Eggenberger, and Frank Hutter. TabPFN: A transformer that solves small tabular classification problems in a second. *arXiv preprint arXiv:2207.01848*, 2022.
- Franziska Horn, Robert Pack, and Michael Rieger. The autofeat python library for automatic feature engineering and selection. *CoRR*, abs/1901.07329, 2019. URL <http://arxiv.org/abs/1901.07329>.
- F. Hutter, L. Kotthoff, and J. Vanschoren (eds.). *Automated Machine Learning: Methods, Systems, Challenges*. Springer, 2019. Available for free at <http://automl.org/book>.
- James Max Kanter and Kalyan Veeramachaneni. Deep feature synthesis: Towards automating data science endeavors. In *2015 IEEE international conference on data science and advanced analytics (DSAA)*, pp. 1–10. IEEE, 2015.
- Udayan Khurana, Deepak Turaga, Horst Samulowitz, and Srinivasan Parthasarathy. Cognito: Automated feature engineering for supervised learning. In *2016 IEEE 16th International Conference on Data Mining Workshops (ICDMW)*, pp. 1304–1307, 2016. doi: 10.1109/ICDMW.2016.0190.
- Udayan Khurana, Horst Samulowitz, and Deepak Turaga. Feature engineering for predictive modeling using reinforcement learning. In *Proceedings of the AAAI Conference on Artificial Intelligence*, volume 32, 2018.
- Doris Jung-Lin Lee and Stephen Macke. A human-in-the-loop perspective on automl: Milestones and the road ahead. *IEEE Data Engineering Bulletin*, 2020.
- Avanika Narayan, Ines Chami, Laurel Orr, Simran Arora, and Christopher Ré. Can foundation models wrangle your data?, 2022.

308 Fatemeh Nargesian, Horst Samulowitz, Udayan Khurana, Elias B Khalil, and Deepak S Turaga.  
309 Learning feature engineering for classification. In *Ijcai*, volume 17, pp. 2529–2535, 2017.

310 OpenAI. Gpt-4 technical report, 2023a.

311 OpenAI. openai/openai-cookbook: Examples and guides for using the openai api. <https://github.com/openai/openai-cookbook>, 2023b. (Accessed on 04/20/2023).

312  
313 OpenAI Community. GPT-3 can’t count syllables - or doesn’t “get” haiku. <https://community.openai.com/t/gpt-3-cant-count-syllables-or-doesnt-get-haiku/18733>, 2021. Accessed on: 2023-03-21.

314  
315

316 Chris Rohlf. Ai code generation and cybersecurity, April 2023. URL <https://www.cfr.org/blog/ai-code-generation-and-cybersecurity>.

317

318 Joaquin Vanschoren, Jan N. van Rijn, Bernd Bischl, and Luis Torgo. Openml: Networked science in  
319 machine learning. *SIGKDD Explorations*, 15(2):49–60, 2013. doi: 10.1145/2641190.2641198.  
320 URL <http://doi.acm.org/10.1145/2641190.2641198>.

321 Joaquin Vanschoren, Jan N. van Rijn, Bernd Bischl, and Luís Torgo. Openml: networked science in  
322 machine learning. *CoRR*, abs/1407.7722, 2014. URL <http://arxiv.org/abs/1407.7722>.

323 Ashish Vaswani, Noam Shazeer, Niki Parmar, Jakob Uszkoreit, Llion Jones, Aidan N. Gomez,  
324 Lukasz Kaiser, and Illia Polosukhin. Attention is all you need. *CoRR*, abs/1706.03762, 2017. URL  
325 <http://arxiv.org/abs/1706.03762>.

326 David Vos, Till Döhmen, and Sebastian Schelter. Towards parameter-efficient automation of data  
327 wrangling tasks with prefix-tuning. In *NeurIPS 2022 First Table Representation Workshop*, 2022.  
328 URL <https://openreview.net/forum?id=8kyYJs2YkFH>.

329 Jason Wei, Maarten Bosma, Vincent Y Zhao, Kelvin Guu, Adams Wei Yu, Brian Lester, Nan Du,  
330 Andrew M Dai, and Quoc V Le. Finetuned language models are zero-shot learners. *arXiv preprint*  
331 *arXiv:2109.01652*, 2021.

332 Jason Wei, Xuezhi Wang, Dale Schuurmans, Maarten Bosma, Brian Ichter, Fei Xia, Ed Chi, Quoc Le,  
333 and Denny Zhou. Chain-of-thought prompting elicits reasoning in large language models, 2023.

334 Wes McKinney. Data Structures for Statistical Computing in Python. In Stéfan van der Walt and  
335 Jarrod Millman (eds.), *Proceedings of the 9th Python in Science Conference*, pp. 56 – 61, 2010.  
336 doi: 10.25080/Majora-92bf1922-00a.

337 Svante Wold, Kim Esbensen, and Paul Geladi. Principal component analysis. *Chemometrics and*  
338 *intelligent laboratory systems*, 2(1-3):37–52, 1987.

339 Jianyu Zhang, Jianye Hao, Françoise Fogelman-Soulié, and Zan Wang. Automatic feature engi-  
340 neering by deep reinforcement learning. In *Proceedings of the 18th International Conference on*  
341 *Autonomous Agents and MultiAgent Systems*, pp. 2312–2314, 2019.

342 Daniel M Ziegler, Nisan Stiennon, Jeffrey Wu, Tom B Brown, Alec Radford, Dario Amodei, Paul  
343 Christiano, and Geoffrey Irving. Fine-tuning language models from human preferences. *arXiv*  
344 *preprint arXiv:1909.08593*, 2019.

## 345 A Acknowledgements

346 GPT-4 (OpenAI, 2023a) was used in the following ways: to help us iterate on LaTeX formatting and  
347 diagram plotting; for text summarization; and as a copyediting tool; for rephrasing proposals.

## 348 B Broader Impact Statement

349 **Social Impact of Automation** The broader implications of our research may contribute to the  
350 automation of data science tasks, potentially displacing workers in the field. However, CAAFE  
351 crucially depends on the users inputs for feature generation and processing and provides an example  
352 of human-in-the-loop AutoML. The automation of routine tasks could free up data scientists to focus  
353 on higher-level problem-solving and decision-making activities. It is essential for stakeholders to  
354 be aware of these potential consequences, and to consider strategies for workforce education and  
355 adaptation to ensure a smooth transition as AI technologies continue to evolve.

356 **Replication of Biases** AI algorithms have been observed to replicate and perpetuate biases observed  
357 in their training data distribution. CAAFE leverages GPT-4, which has been trained on web crawled  
358 data that contains existing social biases and generated features may be biased on these biases. When  
359 data that contains demographic information or other data that can potentially be used to discriminate  
360 against groups, we advise not to use CAAFE or to proceed with great caution, double checking the  
361 generated features.

362 **AI Model Interpretability** As the adoption of advanced AI methods grows, it becomes increasingly  
363 important to understand and interpret their results. Our approach aims to enhance interpretability by  
364 providing clear explanations of model outputs and generating simple code, thus making the automated  
365 feature engineering process more transparent.

366 **Risk of increasing AI capabilities** We do not believe this research affects the general capabilities  
367 of LLMs, but rather demonstrates their application. As such we estimate our work does not contribute  
368 to the risk of increasing AI capabilities.

## 369 C Reproducibility

370 **Code release** In an effort to ensure reproducibility, we release code to reproduce our experiments at  
371 <https://github.com/cafeautomatedfeatures/CAFE>. We release a minimal demo at a [simple](#)  
372 [demo](#).

373 **Availability of datasets** All datasets used in our experiments are freely available at [OpenML.org](https://openml.org) (Van-  
374 schoren et al., 2014) or at [kaggle.com](https://kaggle.com), with downloading procedures included in the submission.

## 375 D Full LLM Prompt

376 Figure 5 shows the full prompt for one exemplary dataset. You can find the generated prompts in  
377 our repository: [https://github.com/cafeautomatedfeatures/CAFE/tree/main/feature\\_](https://github.com/cafeautomatedfeatures/CAFE/tree/main/feature_extension)  
378 [extension](#).

```

The dataframe 'df' is loaded and in memory. Columns are also named attributes.
Description of the dataset in 'df' (column dtypes might be inaccurate):
***Tic-Tac-Toe Endgame database**
This database encodes the complete set of possible board configurations at the end of tic-tac-toe games, where "x" is assumed to have played first. The target concept is "win for x" (i.e., true when "x" has one of 8 possible ways to create a "three-in-a-row"). "

Columns in 'df' (true feature dtypes listed here, categoricals encoded as int):
top-left-square (int32): NaN-freq [0.0%], Samples [2, 2, 2, 2, 2, 2, 0, 1, 1, 2]
top-middle-square (int32): NaN-freq [0.0%], Samples [0, 0, 1, 1, 1, 2, 0, 2, 2, 2]
top-right-square (int32): NaN-freq [0.0%], Samples [1, 0, 1, 2, 1, 1, 1, 0, 2, 1]
middle-left-square (int32): NaN-freq [0.0%], Samples [1, 0, 2, 1, 2, 0, 0, 2, 1, 2]
middle-middle-square (int32): NaN-freq [0.0%], Samples [0, 2, 2, 1, 2, 1, 1, 1, 2, 1]
middle-right-square (int32): NaN-freq [0.0%], Samples [1, 1, 2, 2, 2, 2, 0, 0, 0, 0]
bottom-left-square (int32): NaN-freq [0.0%], Samples [2, 1, 1, 0, 0, 1, 2, 0, 1, 1]
bottom-middle-square (int32): NaN-freq [0.0%], Samples [2, 0, 0, 0, 1, 2, 2, 2, 1, 0]
bottom-right-square (int32): NaN-freq [0.0%], Samples [2, 2, 0, 2, 0, 1, 2, 1, 2, 0]
Class (category): NaN-freq [0.0%], Samples [1.0, 1.0, 1.0, 1.0, 1.0, 0.0, 1.0, 0.0, 0.0, 0.0]

This code was written by an expert datascientist working to improve predictions. It is a snippet of code that adds new columns to the dataset.
Number of samples (rows) in training dataset: 71

This code generates additional columns that are useful for a downstream classification algorithm (such as XGBoost) predicting "Class".
Additional columns add new semantic information, that is they use real world knowledge on the dataset. They can e.g. be feature combinations, transformations, aggregations where the new column is a function of the existing columns.
The scale of columns and offset does not matter. Make sure all used columns exist. Follow the above description of columns closely and consider the datatypes and meanings of classes.
This code also drops columns, if these may be redundant and hurt the predictive performance of the downstream classifier (Feature selection). Dropping columns may help as the chance of overfitting is lower, especially if the dataset is small.
The classifier will be trained on the dataset with the generated columns and evaluated on a holdout set. The evaluation metric is accuracy. The best performing code will be selected.

Added columns can be used in other codeblocks, dropped columns are not available anymore.

Code formatting for each added column:
'''python
# (Feature name and description)
# Usefulness: (Description why this adds useful real world knowledge to classify "Class" according to dataset description and attributes.)
# Input samples: (Three samples of the columns used in the following code, e.g. 'top-left-square': [2, 2, 2], 'top-middle-square': [0, 0, 1], ...)
(Some pandas code using top-left-square', 'top-middle-square', ... to add a new column for each row in df)
'''end

Code formatting for dropping columns:
'''python
# Explanation why the column XX is dropped
df.drop(columns=['XX'], inplace=True)
'''end

Each codeblock generates exactly one useful column and can drop unused columns (Feature selection).
Each codeblock ends with '''end and starts with '''python
Codeblock:

```

Figure 5: Full LLM Prompt for the CMC dataset. The generated code will be the reply to this prompt.

## E Additional Results

### E.1 Per Dataset Results

Table 4: ROC AUC OVO results per dataset and downstream classification method. CAAFE optimized for strong performance on TabPFN.

|                            |                         | AutoFE-Base             |                  | CAAFE                   |                         | AutoFE-Base + CAAFE     |                         |
|----------------------------|-------------------------|-------------------------|------------------|-------------------------|-------------------------|-------------------------|-------------------------|
|                            |                         | AutoFeat                | DFS              | GPT-3.5                 | GPT-4                   | GPT-4 + AF              | GPT-4 + DFS             |
| airlines                   | <b>0.6211</b> $\pm$ .04 | 0.6076 $\pm$ .04        | 0.595 $\pm$ .04  | 0.619 $\pm$ .04         | 0.6203 $\pm$ .04        | 0.602 $\pm$ .04         | 0.5966 $\pm$ .04        |
| balance-scale              | 0.8444 $\pm$ .29        | 0.8438 $\pm$ .30        | 0.8428 $\pm$ .31 | 0.844 $\pm$ .31         | <b>0.882</b> $\pm$ .26  | 0.8812 $\pm$ .27        | 0.8773 $\pm$ .27        |
| breast-w                   | 0.9783 $\pm$ .02        | 0.9713 $\pm$ .03        | 0.9783 $\pm$ .02 | <b>0.9809</b> $\pm$ .02 | <b>0.9809</b> $\pm$ .02 | 0.9713 $\pm$ .03        | <b>0.9809</b> $\pm$ .02 |
| cmc                        | 0.7375 $\pm$ .02        | 0.7384 $\pm$ .02        | 0.7349 $\pm$ .02 | 0.7383 $\pm$ .02        | <b>0.7393</b> $\pm$ .02 | 0.7386 $\pm$ .02        | 0.7362 $\pm$ .02        |
| credit-g                   | 0.7824 $\pm$ .03        | 0.7819 $\pm$ .03        | 0.7824 $\pm$ .03 | 0.7824 $\pm$ .03        | 0.7832 $\pm$ .03        | <b>0.784</b> $\pm$ .03  | 0.7824 $\pm$ .03        |
| diabetes                   | 0.8427 $\pm$ .03        | 0.8414 $\pm$ .03        | 0.8417 $\pm$ .03 | <b>0.8434</b> $\pm$ .03 | 0.8425 $\pm$ .03        | 0.8432 $\pm$ .03        | 0.8382 $\pm$ .03        |
| eucalyptus                 | 0.9319 $\pm$ .01        | 0.9321 $\pm$ .01        | 0.9319 $\pm$ .01 | 0.9317 $\pm$ .01        | 0.9319 $\pm$ .00        | <b>0.9323</b> $\pm$ .01 | 0.9319 $\pm$ .01        |
| jungle_chess..             | 0.9334 $\pm$ .01        | 0.9197 $\pm$ .01        | 0.9284 $\pm$ .01 | 0.9361 $\pm$ .01        | 0.9453 $\pm$ .01        | <b>0.9535</b> $\pm$ .01 | 0.94 $\pm$ .01          |
| (Kaggle) health-insurance  | 0.5745 $\pm$ .02        | <b>0.5805</b> $\pm$ .03 | 0.5753 $\pm$ .02 | 0.5745 $\pm$ .02        | 0.5748 $\pm$ .02        | 0.5777 $\pm$ .03        | 0.5782 $\pm$ .03        |
| (Kaggle) pharyngitis       | 0.6976 $\pm$ .03        | 0.6976 $\pm$ .03        | 0.6976 $\pm$ .03 | 0.6976 $\pm$ .03        | <b>0.7078</b> $\pm$ .04 | 0.7073 $\pm$ .04        | 0.6976 $\pm$ .03        |
| (Kaggle) kidney-stone      | 0.7883 $\pm$ .04        | 0.7856 $\pm$ .04        | 0.7929 $\pm$ .04 | 0.7873 $\pm$ .04        | 0.7903 $\pm$ .04        | 0.7875 $\pm$ .04        | <b>0.7967</b> $\pm$ .03 |
| (Kaggle) spaceship-titanic | 0.838 $\pm$ .02         | 0.8486 $\pm$ .02        | 0.8443 $\pm$ .02 | 0.8383 $\pm$ .02        | 0.8405 $\pm$ .02        | <b>0.853</b> $\pm$ .02  | 0.8486 $\pm$ .02        |
| pc1                        | 0.9035 $\pm$ .01        | 0.9046 $\pm$ .01        | 0.9035 $\pm$ .01 | 0.9087 $\pm$ .02        | <b>0.9093</b> $\pm$ .01 | 0.908 $\pm$ .01         | 0.9035 $\pm$ .01        |
| tic-tac-toe                | 0.6989 $\pm$ .08        | 0.6989 $\pm$ .08        | 0.6291 $\pm$ .10 | 0.6989 $\pm$ .08        | <b>0.9536</b> $\pm$ .06 | <b>0.9536</b> $\pm$ .06 | 0.938 $\pm$ .06         |
| Mean ROC                   | 0.798 $\pm$ .05         | 0.7966 $\pm$ .05        | 0.7913 $\pm$ .05 | 0.7987 $\pm$ .05        | <b>0.8215</b> $\pm$ .04 | 0.8209 $\pm$ .05        | 0.8176 $\pm$ .04        |
| Mean Rank                  | 4.68                    | 4.75                    | 5.29             | 4.36                    | <b>2.39</b>             | 2.57                    | 3.96                    |

### E.2 Generated Prompts and Code

You can find the generated prompts and the respective LLM generated code in our repository:  
[https://github.com/cafeautomatedfeatures/CAFE/tree/main/data/generated\\_code](https://github.com/cafeautomatedfeatures/CAFE/tree/main/data/generated_code).

## F Compute

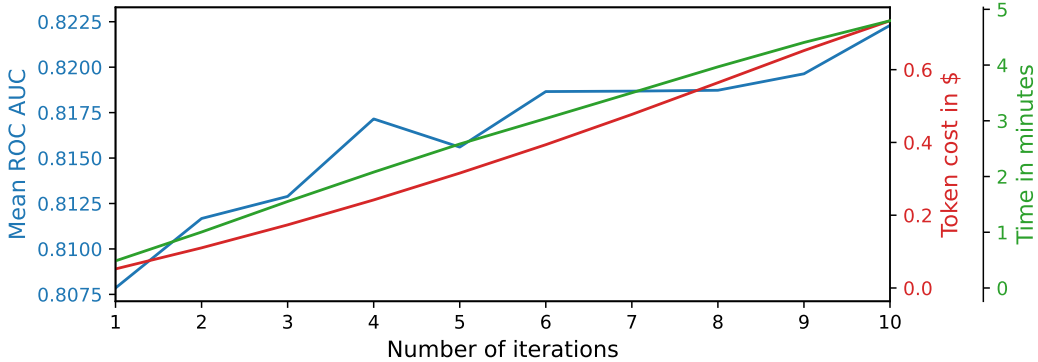

Figure 6: Mean ROC AUC OVO, inference cost for GPT and time spent with an increasing number of feature generation runs.

Figure F illustrates the increasing performance but also cost and time spent for more feature engineering iterations. Prediction for LLMs is done per token and so the generation of code takes dominates the 4:43 minutes evaluation time of CAAFE on average per dataset. For GPT-3.5 this time is reduce to about 1/4. Also for GPT-3.5 the cost is reduced to 1/10 as of the writing of this paper. For the evaluation of TabPFN we use one Nvidia RTX 2080 Ti as well as 8 Intel(R) Xeon(R) Gold 6242 CPU @ 2.80GHz CPU cores.

## 391 G Datasets

| Name                                   | # Features | # Samples | # Classes | OpenML ID / Kaggle Name                                   |
|----------------------------------------|------------|-----------|-----------|-----------------------------------------------------------|
| balance-scale                          | 4          | 125       | 3         | 11                                                        |
| breast-w                               | 9          | 69        | 2         | 15                                                        |
| cmc                                    | 9          | 1473      | 3         | 23                                                        |
| credit-g                               | 20         | 1000      | 2         | 31                                                        |
| diabetes                               | 8          | 768       | 2         | 37                                                        |
| tic-tac-toe                            | 9          | 95        | 2         | 50                                                        |
| eucalyptus                             | 19         | 736       | 5         | 188                                                       |
| pc1                                    | 21         | 1109      | 2         | 1068                                                      |
| airlines                               | 7          | 2000      | 2         | 1169                                                      |
| jungle_chess_2pcs_raw_endgame_complete | 6          | 2000      | 3         | 41027                                                     |
| pharyngitis                            | 19         | 512       | 2         | <a href="#">pharyngitis</a>                               |
| health-insurance                       | 13         | 2000      | 2         | <a href="#">health-insurance-lead-prediction-raw-data</a> |
| spaceship-titanic                      | 13         | 2000      | 2         | <a href="#">spaceship-titanic</a>                         |
| kidney-stone                           | 7          | 414       | 2         | <a href="#">playground-series-s3e12</a>                   |

Table 5: Test datasets used for the evaluation. See Section 4 for a description of the datasets used.

### 392 G.1 Dataset Collection and Preprocessing

393 **OpenML datasets** We use small datasets from OpenML (Vanschoren et al., 2013; Feurer et al.)  
394 that have descriptive feature names (i.e. we do not include any datasets with numbered feature names).  
395 Datasets on OpenML contain a task description that we provide as user context to our method and that  
396 we clean from redundant information for feature engineering, such as author names or release history.  
397 While some descriptions are very informative, other descriptions contain much less information. We  
398 remove datasets with more than 20 features, since the prompt length rises linearly with the number  
399 of features and exceeds the permissible 8,192 tokens that standard GPT-4 can accept. We show all  
400 datasets we used in Table 5 in Appendix G. When datasets are perfectly solvable with TabPFN alone  
401 (i.e. reaches ROC AUC of 1.0) we reduce the training set size for that dataset to 10% or 20% of the  
402 original dataset size. This is the case for the datasets “balance-scale” (20%), “breast-w” (10%) and  
403 “tic-tac-toe” (10%). We focus on small datasets with up to 2 000 samples in total, because feature  
404 engineering is most important and significant for smaller datasets.

405 **Kaggle datasets** We additionally evaluate CAAFE on 4 datasets from Kaggle that were released  
406 after the knowledge cutoff of our LLM Model. These datasets contain string features as well. String  
407 features allow for more complex feature transformations, such as separating Names into First and  
408 Last Names, which allows grouping families. We drop rows that contain missing values for our  
409 evaluations. Details of these datasets can also be found in Table 5 in Appendix G.

### 410 G.2 Dataset Descriptions

411 The dataset descriptions used were crawled from the respective datasource. For OpenML prompts  
412 uninformative information such as the source or reference papers were removed. Figures 20 show the  
413 parsed dataset descriptions used for each dataset.

```

**Balance Scale Weight & Distance Database**
This data set was generated to model psychological experimental results. Each example is
classified as having the balance scale tip to the right, tip to the left, or be
balanced. The attributes are the left weight, the left distance, the right weight,
and the right distance. The correct way to find the class is the greater of (left-
distance * left-weight) and (right-distance * right-weight). If they are equal, it
is balanced.

Attribute description
The attributes are the left weight, the left distance, the right weight, and the right
distance.

```

Figure 7: Dataset description for balance-scale.

```

**Breast Cancer Wisconsin (Original) Data Set.** Features are computed from a digitized
image of a fine needle aspirate (FNA) of a breast mass. They describe
characteristics of the cell nuclei present in the image. The target feature records
the prognosis (malignant or benign).

```

Figure 8: Dataset description for breast-w.

```

4. Relevant Information:
This dataset is a subset of the 1987 National Indonesia Contraceptive
Prevalence Survey. The samples are married women who were either not
pregnant or do not know if they were at the time of interview. The
problem is to predict the current contraceptive method choice
(no use, long-term methods, or short-term methods) of a woman based
on her demographic and socio-economic characteristics.

7. Attribute Information:

1. Wife's age                (numerical)
2. Wife's education          (categorical)    1=low, 2, 3, 4=high
3. Husband's education       (categorical)    1=low, 2, 3, 4=high
4. Number of children ever born (numerical)
5. Wife's religion           (binary)         0=Non-Islam, 1=Islam
6. Wife's now working?       (binary)         0=Yes, 1=No
7. Husband's occupation      (categorical)    1, 2, 3, 4
8. Standard-of-living index   (categorical)    1=low, 2, 3, 4=high
9. Media exposure            (binary)         0=Good, 1=Not good
10. Contraceptive method used (class attribute) 1=No-use
                                           2=Long-term
                                           3=Short-term

```

Figure 9: Dataset description for cmc.

```

**German Credit dataset**
This dataset classifies people described by a set of attributes as good or bad credit
risks.

This dataset comes with a cost matrix:
'''
Good  Bad (predicted)
Good  0    1 (actual)
Bad   5    0
'''

It is worse to class a customer as good when they are bad (5), than it is to class a
customer as bad when they are good (1).

Attribute description

1. Status of existing checking account, in Deutsche Mark.
2. Duration in months
3. Credit history (credits taken, paid back duly, delays, critical accounts)
4. Purpose of the credit (car, television,...)
5. Credit amount
6. Status of savings account/bonds, in Deutsche Mark.
7. Present employment, in number of years.
8. Installment rate in percentage of disposable income
9. Personal status (married, single,...) and sex
10. Other debtors / guarantors
11. Present residence since X years
12. Property (e.g. real estate)
13. Age in years
14. Other installment plans (banks, stores)
15. Housing (rent, own,...)
16. Number of existing credits at this bank
17. Job
18. Number of people being liable to provide maintenance for
19. Telephone (yes,no)
20. Foreign worker (yes,no)

```

Figure 10: Dataset description for credit-g.

```

4. Relevant Information:
    Several constraints were placed on the selection of these instances from
    a larger database. In particular, all patients here are females at
    least 21 years old of Pima Indian heritage. ADAP is an adaptive learning
    routine that generates and executes digital analogs of perceptron-like
    devices. It is a unique algorithm; see the paper for details.

7. For Each Attribute: (all numeric-valued)
1. Number of times pregnant
2. Plasma glucose concentration a 2 hours in an oral glucose tolerance test
3. Diastolic blood pressure (mm Hg)
4. Triceps skin fold thickness (mm)
5. 2-Hour serum insulin (mu U/ml)
6. Body mass index (weight in kg/(height in m)^2)
7. Diabetes pedigree function
8. Age (years)
9. Class variable (0 or 1)

Relabeled values in attribute 'class'
From: 0                      To: tested_negative
From: 1                      To: tested_positive

```

Figure 11: Dataset description for diabetes.

```

**Tic-Tac-Toe Endgame database**
This database encodes the complete set of possible board configurations at the end of tic
-tac-toe games, where "x" is assumed to have played first. The target concept is "
win for x" (i.e., true when "x" has one of 8 possible ways to create a "three-in-a-
row").

```

Figure 12: Dataset description for tic-tac-toe.

```

**Eucalyptus Soil Conservation**
The objective was to determine which seedlots in a species are best for soil conservation
in seasonally dry hill country. Determination is found by measurement of height,
diameter by height, survival, and other contributing factors.

It is important to note that eucalypt trial methods changed over time; earlier trials
included mostly 15 - 30cm tall seedling grown in peat plots and the later trials
have included mostly three replications of eight trees grown. This change may
contribute to less significant results.

Experimental data recording procedures which require noting include:
- instances with no data recorded due to experimental recording procedures
require that the absence of a species from one replicate at a site was
treated as a missing value, but if absent from two or more replicates at a
site the species was excluded from the site's analyses.
- missing data for survival, vigour, insect resistance, stem form, crown form
and utility especially for the data recorded at the Morea Station; this
could indicate the death of species in these areas or a lack in collection
of data.

Attribute Information

1. Abbrev - site abbreviation - enumerated
2. Rep - site rep - integer
3. Locality - site locality in the North Island - enumerated
4. Map_Ref - map location in the North Island - enumerated
5. Latitude - latitude approximation - enumerated
6. Altitude - altitude approximation - integer
7. Rainfall - rainfall (mm pa) - integer
8. Frosts - frosts (deg. c) - integer
9. Year - year of planting - integer
10. Sp - species code - enumerated
11. PMCno - seedlot number - integer
12. DBH - best diameter base height (cm) - real
13. Ht - height (m) - real
14. Surv - survival - integer
15. Vig - vigour - real
16. Ins_res - insect resistance - real
17. Stem_Fm - stem form - real
18. Crown_Fm - crown form - real
19. Brnch_Fm - branch form - real
Class:
20. Utility - utility rating - enumerated

Relevant papers

Bulluch B. T., (1992) Eucalyptus Species Selection for Soil Conservation in Seasonally
Dry Hill Country - Twelfth Year Assessment New Zealand Journal of Forestry Science
21(1): 10 - 31 (1991)

Kirsten Thomson and Robert J. McQueen (1996) Machine Learning Applied to Fourteen
Agricultural Datasets. University of Waikato Research Report
https://www.cs.waikato.ac.nz/ml/publications/1996/Thomson-McQueen-96.pdf + the original
publication:

```

Figure 13: Dataset description for eucalyptus.

Binarized version of the original data set (see version 1). The multi-class target feature is converted to a two-class nominal target feature by re-labeling the majority class as positive ('P') and all others as negative ('N'). Originally converted by Quan Sun.

Figure 14: Dataset description for wine.

**\*\*PC1 Software defect prediction\*\***  
 One of the NASA Metrics Data Program defect data sets. Data from flight software for earth orbiting satellite. Data comes from McCabe and Halstead features extractors of source code. These features were defined in the 70s in an attempt to objectively characterize code features that are associated with software quality.

#### Attribute Information

|                      |                                                                  |
|----------------------|------------------------------------------------------------------|
| 1. loc               | : numeric % McCabe's line count of code                          |
| 2. v(g)              | : numeric % McCabe "cyclomatic complexity"                       |
| 3. ev(g)             | : numeric % McCabe "essential complexity"                        |
| 4. iv(g)             | : numeric % McCabe "design complexity"                           |
| 5. n                 | : numeric % Halstead total operators + operands                  |
| 6. v                 | : numeric % Halstead "volume"                                    |
| 7. l                 | : numeric % Halstead "program length"                            |
| 8. d                 | : numeric % Halstead "difficulty"                                |
| 9. i                 | : numeric % Halstead "intelligence"                              |
| 10. e                | : numeric % Halstead "effort"                                    |
| 11. b                | : numeric % Halstead                                             |
| 12. t                | : numeric % Halstead's time estimator                            |
| 13. l0Code           | : numeric % Halstead's line count                                |
| 14. l0Comment        | : numeric % Halstead's count of lines of comments                |
| 15. l0Blank          | : numeric % Halstead's count of blank lines                      |
| 16. l0CodeAndComment | : numeric                                                        |
| 17. uniq_Op          | : numeric % unique operators                                     |
| 18. uniq_Opnd        | : numeric % unique operands                                      |
| 19. total_Op         | : numeric % total operators                                      |
| 20. total_Opnd       | : numeric % total operands                                       |
| 21. branchCount      | : numeric % of the flow graph                                    |
| 22. branchCount      | : numeric % of the flow graph                                    |
| 23. defects          | : {false,true} % module has/has not one or more reported defects |

#### Relevant papers

- Shepperd, M. and Qinbao Song and Zhongbin Sun and Mair, C. (2013) Data Quality: Some Comments on the NASA Software Defect Datasets, IEEE Transactions on Software Engineering, 39.
- Tim Menzies and Justin S. Di Stefano (2004) How Good is Your Blind Spot Sampling Policy ? 2004 IEEE Conference on High Assurance Software Engineering.
- T. Menzies and J. DiStefano and A. Orrego and R. Chapman (2004) Assessing Predictors of Software Defects", Workshop on Predictive Software Models, Chicago

Figure 15: Dataset description for pc1.

Airlines Dataset Inspired in the regression dataset from Elena Ikonovska. The task is to predict whether a given flight will be delayed, given the information of the scheduled departure.

Figure 16: Dataset description for airlines.

|                                                                                                                                                                                                                                                                                                                                                                                                                                                                                                                                                                                                                                                                                                                                                                                                                                                                                                                                                                                                                                                                                                                                                                                                                                                                                                                                                                                                                                                                                                                                                                                                                              |
|------------------------------------------------------------------------------------------------------------------------------------------------------------------------------------------------------------------------------------------------------------------------------------------------------------------------------------------------------------------------------------------------------------------------------------------------------------------------------------------------------------------------------------------------------------------------------------------------------------------------------------------------------------------------------------------------------------------------------------------------------------------------------------------------------------------------------------------------------------------------------------------------------------------------------------------------------------------------------------------------------------------------------------------------------------------------------------------------------------------------------------------------------------------------------------------------------------------------------------------------------------------------------------------------------------------------------------------------------------------------------------------------------------------------------------------------------------------------------------------------------------------------------------------------------------------------------------------------------------------------------|
| <p>Description</p> <p>This dataset is part of a collection datasets based on the game "Jungle Chess" (a.k.a. Dou Shou Qi). For a description of the rules, please refer to the paper (link attached). The paper also contains a description of various constructed features. As the tablebases are a disjoint set of several tablebases based on which (two) pieces are on the board, we have uploaded all tablebases that have explicit different content:</p> <ul style="list-style-type: none"> <li>* Rat vs Rat</li> <li>* Rat vs Panther</li> <li>* Rat vs. Lion</li> <li>* Rat vs. Elephant</li> <li>* Panther vs. Lion</li> <li>* Panther vs. Elephant</li> <li>* Tiger vs. Lion</li> <li>* Lion vs. Lion</li> <li>* Lion vs. Elephant</li> <li>* Elephant vs. Elephant</li> <li>* Complete (Combination of the above)</li> <li>* RAW Complete (Combination of the above, containing for both pieces just the rank, file and strength information). This dataset contains a similar classification problem as , e.g., the King and Rook vs. King problem and is suitable for classification tasks.</li> </ul> <p>(Note that this dataset is one of the above mentioned datasets). Additionally, note that several subproblems are very similar. Having seen a given positions from one of the tablebases arguably gives a lot of information about the outcome of the same position in the other tablebases.</p> <p>J. N. van Rijn and J. K. Vis, Endgame Analysis of Dou Shou Qi. ICGA Journal 37:2, 120--124, 2014. ArXiv link: <a href="https://arxiv.org/abs/1604.07312">https://arxiv.org/abs/1604.07312</a></p> |
|------------------------------------------------------------------------------------------------------------------------------------------------------------------------------------------------------------------------------------------------------------------------------------------------------------------------------------------------------------------------------------------------------------------------------------------------------------------------------------------------------------------------------------------------------------------------------------------------------------------------------------------------------------------------------------------------------------------------------------------------------------------------------------------------------------------------------------------------------------------------------------------------------------------------------------------------------------------------------------------------------------------------------------------------------------------------------------------------------------------------------------------------------------------------------------------------------------------------------------------------------------------------------------------------------------------------------------------------------------------------------------------------------------------------------------------------------------------------------------------------------------------------------------------------------------------------------------------------------------------------------|

Figure 17: Dataset description for jungle\_chess\_2pcs\_raw\_endgame\_complete.

|                                                                                                                                                                                                                                                                                                                                                                                      |
|--------------------------------------------------------------------------------------------------------------------------------------------------------------------------------------------------------------------------------------------------------------------------------------------------------------------------------------------------------------------------------------|
| <p>For the data and objective, it is evident that this is a Binary Classification Problem data in the Tabular Data format.</p> <p>A policy is recommended to a person when they land on an insurance website, and if the person chooses to fill up a form to apply, it is considered a Positive outcome (Classified as lead). All other conditions are considered Zero outcomes.</p> |
|--------------------------------------------------------------------------------------------------------------------------------------------------------------------------------------------------------------------------------------------------------------------------------------------------------------------------------------------------------------------------------------|

Figure 18: Dataset description for Kaggle\_health-insurance-lead-prediction-raw-data.

|                                                                                                                                                                                                                                                                                                                                                                                                                                                                                                                                                                                                                                                                       |
|-----------------------------------------------------------------------------------------------------------------------------------------------------------------------------------------------------------------------------------------------------------------------------------------------------------------------------------------------------------------------------------------------------------------------------------------------------------------------------------------------------------------------------------------------------------------------------------------------------------------------------------------------------------------------|
| <p>Group A streptococcus (GAS) infection is a major cause of pediatric pharyngitis, and infection with this organism requires appropriate antimicrobial therapy.</p> <p>There is controversy as to whether physicians can rely on signs and symptoms to select pediatric patients with pharyngitis who should undergo rapid antigen detection testing (RADT) for GAS .</p> <p>Our objective was to evaluate the validity of signs and symptoms in the selective testing of children with pharyngitis.</p> <p>Now, let's use machine learning to analyze whether a diagnosis can be made from the child's symptoms and signs.</p> <p>Can we predict RADT positive?</p> |
|-----------------------------------------------------------------------------------------------------------------------------------------------------------------------------------------------------------------------------------------------------------------------------------------------------------------------------------------------------------------------------------------------------------------------------------------------------------------------------------------------------------------------------------------------------------------------------------------------------------------------------------------------------------------------|

Figure 19: Dataset description for Kaggle\_pharyngitis.

**Dataset Description**  
 In this competition your task is to predict whether a passenger was transported to an alternate dimension during the Spaceship Titanic's collision with the spacetime anomaly. To help you make these predictions, you're given a set of personal records recovered from the ship's damaged computer system.

**File and Data Field Descriptions**  
 train.csv - Personal records for about two-thirds (~8700) of the passengers, to be used as training data.  
 PassengerId - A unique Id for each passenger. Each Id takes the form gggg\_pp where gggg indicates a group the passenger is travelling with and pp is their number within the group. People in a group are often family members, but not always.  
 HomePlanet - The planet the passenger departed from, typically their planet of permanent residence.  
 CryoSleep - Indicates whether the passenger elected to be put into suspended animation for the duration of the voyage. Passengers in cryosleep are confined to their cabins.  
 Cabin - The cabin number where the passenger is staying. Takes the form deck/num/side, where side can be either P for Port or S for Starboard.  
 Destination - The planet the passenger will be debarking to.  
 Age - The age of the passenger.  
 VIP - Whether the passenger has paid for special VIP service during the voyage.  
 RoomService, FoodCourt, ShoppingMall, Spa, VRDeck - Amount the passenger has billed at each of the Spaceship Titanic's many luxury amenities.  
 Name - The first and last names of the passenger.  
 Transported - Whether the passenger was transported to another dimension. This is the target, the column you are trying to predict.

Figure 20: Dataset description for kaggle\_spaceship-titanic.
